# Supplementary material for: Tunable functional coverage of biocompatible magnesium silicate nanotubes by microwave-assisted silanization
Source: Royal Society of Chemistry journal article supplement (doi:10.1039/d5nr02385h), 2025-01-01
Supplement: d5nr02385h1.pdf [file d5nr02385h1.pdf]

## SUPPLEMENTARY INFORMATION

### Tunable functional coverage of biocompatible magnesium silicate nanotubes by microwave-assisted silanization

Valeria Secchi,<sup>a</sup> Daniela D'Alessio,<sup>b</sup> Andrea Erroi,<sup>a</sup> Silvia Mostoni,<sup>a</sup> Giancarlo Capitani,<sup>b</sup> Alberto Calloni,<sup>c</sup> Gianlorenzo Bussetti,<sup>c</sup> Massimiliano D'Arienzo,<sup>a</sup> Roberto Lorenzi,<sup>a</sup> Keren Keinan-Adamsky,<sup>d</sup> Shai Rahimipour,<sup>d</sup> Angelo Monguzzi,<sup>a</sup> and Marcello Campione<sup>b,\*</sup>

<sup>a</sup> Department of Materials Science, University of Milano – Bicocca, Milano I-20125, Italy Address here.

<sup>b</sup> Department of Earth and Environmental Sciences, University of Milano – Bicocca, Milano I-20126, Italy

<sup>c</sup> Department of Physics, Politecnico di Milano, Milano I-20133, Italy

<sup>d</sup> Department of Chemistry, Bar-Ilan University, Ramat-Gan 5290002, Israel

#### Calibration of the ninhydrin optical response

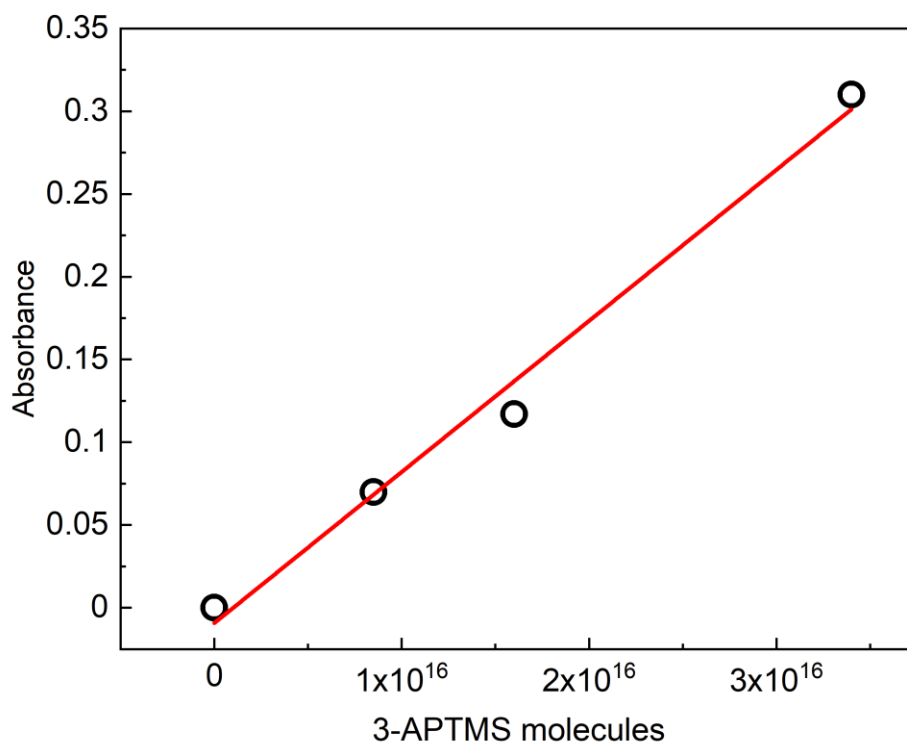

**Figure S1** 3-APTMS calibration curve performed by measuring the absorbance at  $\lambda = 588$  nm of increasing numbers of 3-APTMS molecules. The molar extinction coefficient is calculated as the slope of the straight line  $\varepsilon = (y_2 - y_1)/(x_2 - x_1)$  where  $y$  are the absorbance values and  $x$  are the number of 3-APTMS.  $\varepsilon = 9.12 \times 10^{-18} \text{ (cm} \times \text{M)}^{-1}$ .

## TEM images of isolated NTs

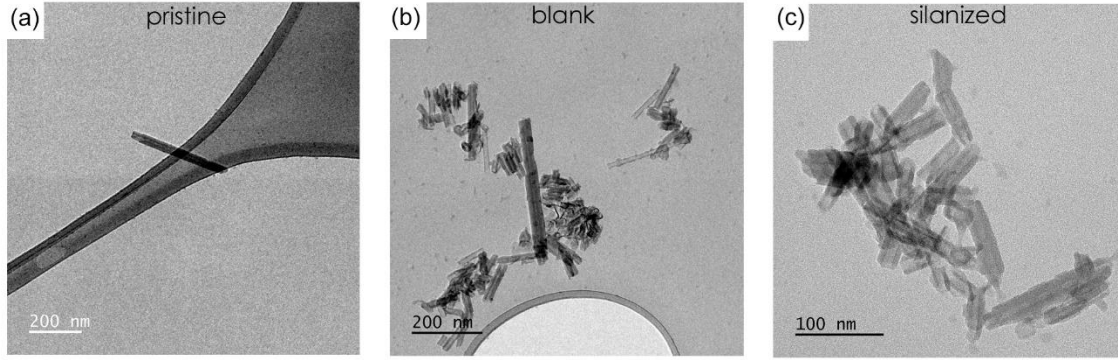

**Figure S2** Bright-field TEM images of as synthesized NTs (a) and after MW-assisted treatment with (c) and without (b) 3-APTMS silanizing agent, deposited from isopropanol on lacey C-coated Cu-grids.

## TGA characterization

To estimate the amount of hydroxyl groups on the surface of bare NTs, thermogravimetric analysis (TGA) was employed. The weight loss observed in the temperature range of 150–1000 °C ( $\Delta W_{150-1000^\circ\text{C}}$ , Fig. S3 and S4) was attributed to the desorption of water resulting from the recombination of two surface –OH groups. The following equation was used for this estimation:

$$\Delta w_{150-1000^\circ\text{C}} = \frac{1}{2} n_{\text{OH}} \text{MW}_{\text{H}_2\text{O}} \quad (\text{S1})$$

where  $n_{\text{OH}}$  are the moles of surface hydroxyl groups and  $\text{MW}_{\text{H}_2\text{O}}$  is the molecular weight of water. The amount of OH groups available onto bare NTs can be calculated:

$$w\%_{\text{OH}} = \frac{n_{\text{OH}} \text{MW}_{\text{OH}}}{w_{\text{NTs}(150^\circ\text{C})}} 100 = \frac{2\Delta w_{150-1000^\circ\text{C}} \text{MW}_{\text{OH}}}{\text{MW}_{\text{H}_2\text{O}} w_{\text{NTs}(150^\circ\text{C})}} 100 \quad (\text{S2})$$

Where  $\text{MW}_{\text{OH}}$  is the molecular weight of OH groups and  $w_{\text{NTs}(150^\circ\text{C})}$  is the weight of the sample after drying at 150 °C, necessary to remove the physisorbed species as solvent molecules.

The increased weight loss observed in the functionalized NTs sample within the temperature range of 150–1000 °C is attributed to several processes:

- (i) the combustion of the –CH<sub>2</sub>CH<sub>2</sub>CH<sub>2</sub>NH<sub>2</sub> functional group derived from 3-APTMS, which is covalently anchored to the NTs surface;
- (ii) water desorption resulting from the recombination of surface –OH groups, assuming that each 3-APTMS molecule is bound to the surface via two hydroxyl groups;
- (iii) desorption of water originating from –OH groups formed by the hydrolysis of the third ethoxy group of 3-APTMS, which does not participate in bonding with the NTs surface.

The following equation was used to determine the degree of functionalization:

$$\Delta W_{150-1000^\circ\text{C}} = n_{\text{F}} \cdot \text{MW}_{\text{F}} + \frac{1}{2} \cdot (n_{\text{OH}} \cdot w_{\text{NTs}(1000^\circ\text{C})} - 2n_{\text{F}}) \cdot \text{MW}_{\text{H}_2\text{O}} + \frac{1}{2} \cdot (n_{\text{OH-APTMS}} \cdot \text{MW}_{\text{H}_2\text{O}}) \quad (\text{S3})$$

where  $n_{\text{F}}$  represents the number of moles of 3-APTMS grafted onto the NTs surface,  $\text{MW}_{\text{F}}$  (58.0 g mol<sup>−1</sup>) is the molecular weight of the –CH<sub>2</sub>CH<sub>2</sub>CH<sub>2</sub>NH<sub>2</sub> group derived from 3-APTMS and anchored to the NTs,  $n_{\text{OH}}$  is the total number of hydroxyl groups per gram of NTs, previously determined by TGA (Eq. S1) and equal to 18 mmol g<sup>−1</sup>.  $w_{\text{NTs}(1000^\circ\text{C})}$  is the weight of the sample at 1000 °C.  $n_{\text{OH-APTMS}}$  denotes the number of moles of hydroxyl groups bonded to 3-APTMS (equal to  $n_{\text{F}}$  under the assumption that each 3-APTMS molecule is attached via a bi-dentate bond). The factor  $\frac{1}{2}$  accounts for the condensation reaction, in which two hydroxyl groups combine to release one molecule of water. This same equation, with minor modifications, has also been applied to calculate  $n_{\text{F}}$  in cases where 3-APTMS forms either mono- or tri-dentate bonds.

From Eq. S3,  $n_{\text{F}}$  is then used to calculate the amount of 3-APTMS grafted onto NTs ( $w\%_{\text{APTMS}}$ , Fig. S4) and the number of 3-APTMS molecules anchored per squared nanometres of surface of NTs ( $\sigma$ , Fig. S5):

$$w\%_{\text{APTMS}} = \frac{n_{\text{F}} \cdot \text{MW}_{\text{F}}}{w_{\text{NTs}(1000^\circ\text{C})}} 100 \quad (\text{S4})$$

$$\sigma \text{ [number molecules/nm}^2\text{]} = \frac{n_F \text{ [mol]} \cdot N_A \text{ [number/mol]}}{w_{\text{NTs}(1000^\circ\text{C})} \text{ [g]} \cdot \text{SSA} \text{ [m}^2\text{/g]} \cdot 10^{18} \text{ [nm}^2\text{/m}^2\text{]}} \quad (\text{S5})$$

where  $N_A$  the Avogadro number, SSA the specific surface area of NTs ( $\text{SSA} = 147 \pm 3 \text{ m}^2 \text{ g}^{-1}$ , see BET isotherm in Figure 4d).

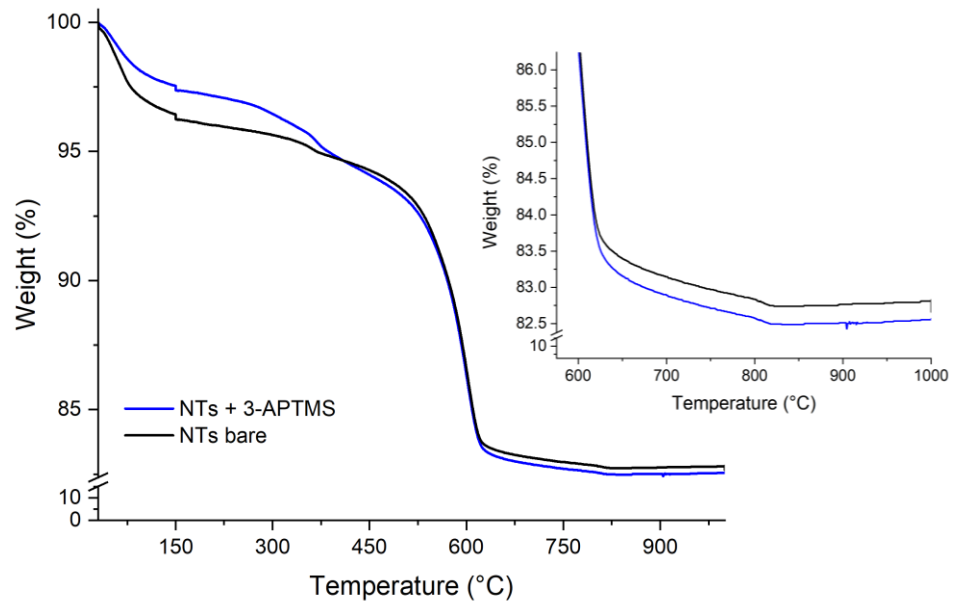

**Figure S3** Weight loss as a function of temperature in bare NTs (black curve) and functionalized NTs. The inset shows an enlarged view within the temperature range 600–1000 °C.

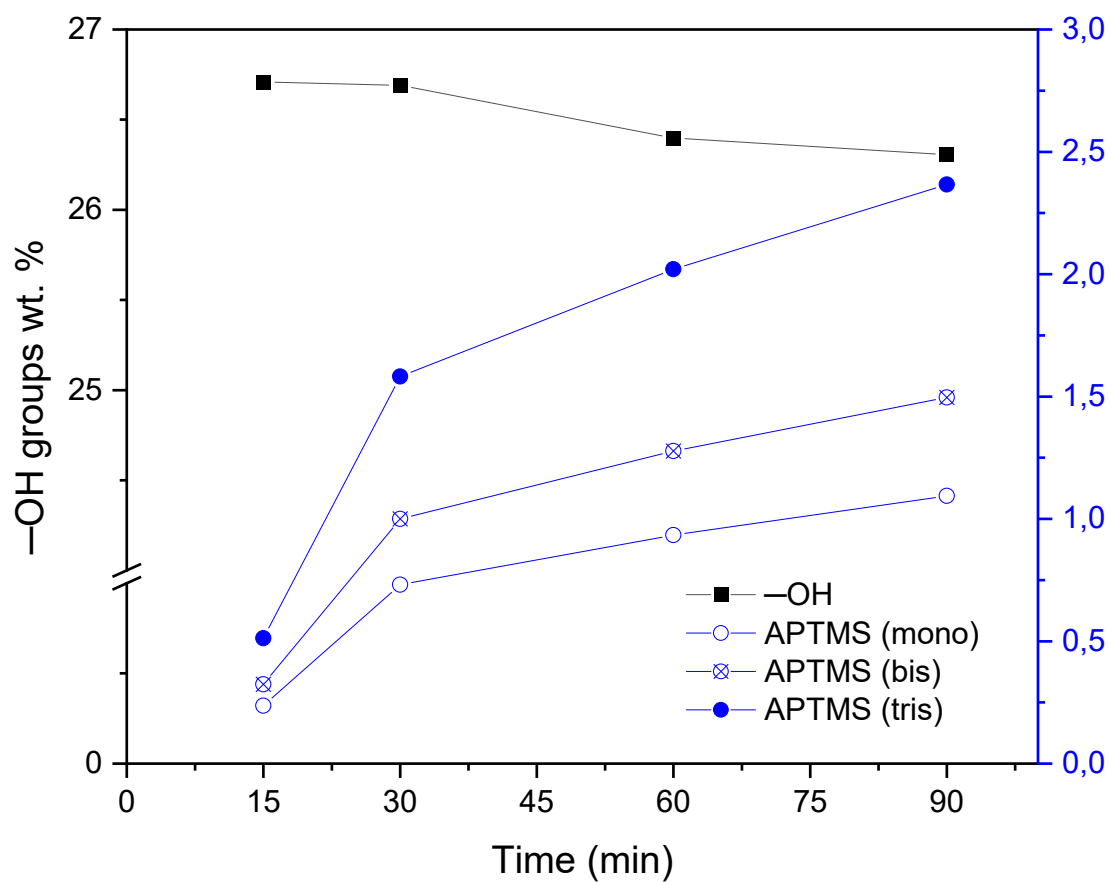

**Figure S4** Weight fraction of -OH groups (black symbols) and weight fraction of 3-APTMS (blue symbols) as a function of treatment time calculated from the TGA results obtained from NT samples corresponding to the same series reported in Fig. 9.

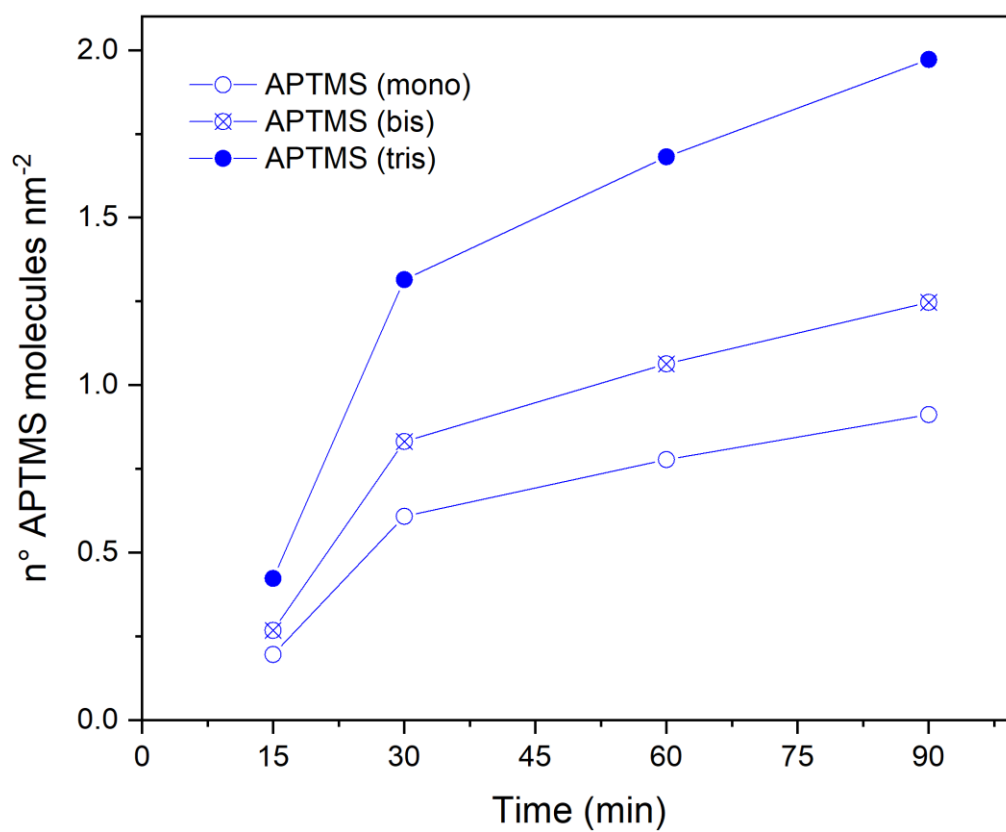

**Figure S5** Number of bonded silane molecules per square nm as deduced from the TGA of NT samples corresponding to the same series reported in Fig. 9 and assuming mono-, bi, and tri-dentate bonding.
